# Supplementary material for: Electron transport bilayer with cascade energy alignment based on Nb2O5–Ti3C2 MXene/TiO2 for efficient perovskite solar cells
Source: Royal Society of Chemistry journal article supplement (doi:10.1039/d3tc00022b), 2023-01-01
Supplement: d3tc00022b1.pdf [file d3tc00022b1.pdf]

## *Electronic Supplementary Information*

# Electron transport bilayer with cascade energy alignment based on Nb<sub>2</sub>O<sub>5</sub>-Ti<sub>3</sub>C<sub>2</sub> MXene/TiO<sub>2</sub> for efficient perovskite solar cells

*Hugo G. Lemos<sup>a\*</sup>, Jessica H. H. Rossato<sup>a</sup>, Roberto A. Ramos Jr.<sup>a</sup>, João V. M. Lima<sup>a</sup>, Lucas J. Affonço<sup>a</sup>,  
Sergei Trofimov<sup>b</sup>, Jose J. I. Michel<sup>c</sup>, Silvia L. Fernandes<sup>a</sup>, Boris Naydenov<sup>b</sup>, and Carlos F. O. Graeff<sup>a\*</sup>*

<sup>a</sup> Department of Physics, School of Sciences, São Paulo State University (UNESP), Bauru, São Paulo, 17033-360, Brazil

<sup>b</sup> Department Spins in Energy Conversion and Quantum Information Science, Helmholtz-Zentrum Berlin

<sup>c</sup> Department of Electrical and Electronic Engineering, The University of Melbourne, VIC 3010, Australia

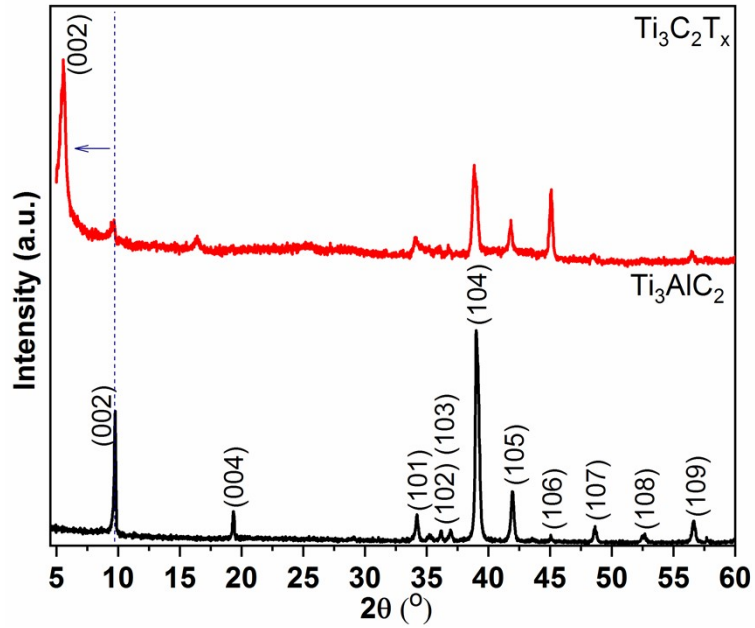

**Figure S1.** XRD patterns of  $\text{Ti}_3\text{AlC}_2$  MAX phase and  $\text{Ti}_3\text{C}_2\text{T}_x$  MXene.

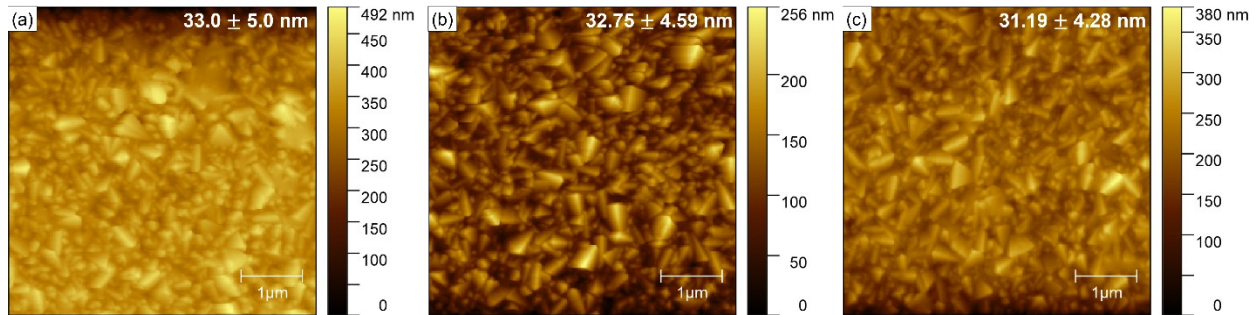

**Figure S2.** AFM images of  $\text{Nb}_2\text{O}_5$  (a),  $\text{Nb}_2\text{O}_5\text{-Ti}_3\text{C}_2$  (0.4 wt%) (b) and  $\text{Nb}_2\text{O}_5\text{-Ti}_3\text{C}_2$  (0.8 wt%) (c) layers.

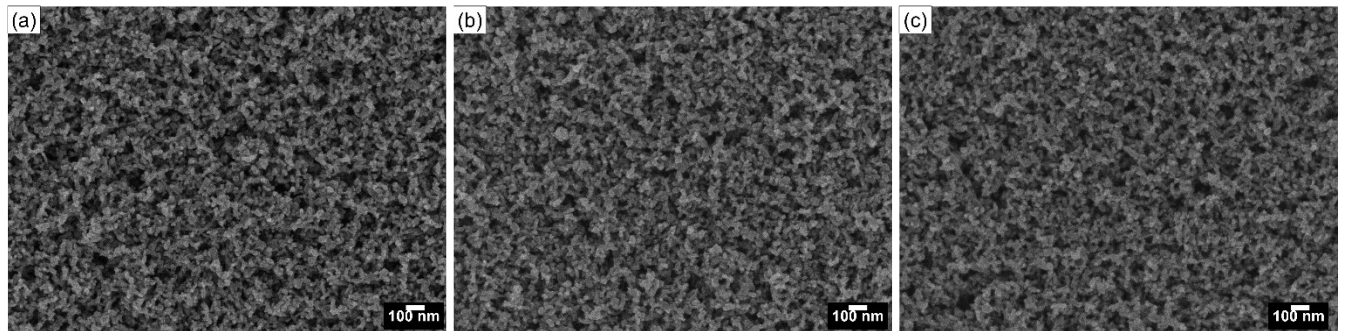

**Figure S3.** FE-SEM images of  $\text{TiO}_2$  films on top of  $\text{Nb}_2\text{O}_5$  (a),  $\text{Nb}_2\text{O}_5\text{-Ti}_3\text{C}_2$  (0.4 wt%) (b) and  $\text{Nb}_2\text{O}_5\text{-Ti}_3\text{C}_2$  (0.8 wt%) (c) layers.

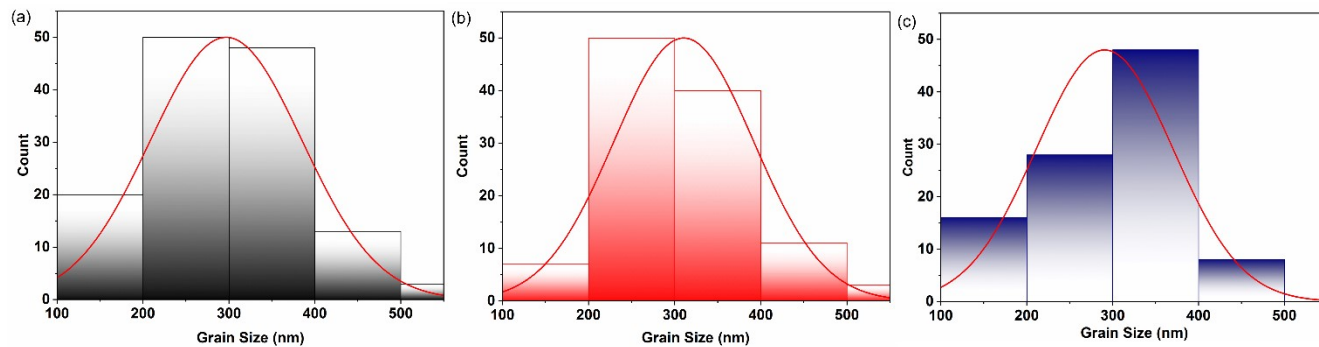

**Figure S4.** Grain size distribution measurements of perovskite films on top of ETLs based on  $\text{Nb}_2\text{O}_5$  (a),  $\text{Nb}_2\text{O}_5\text{-Ti}_3\text{C}_2$  (0.4 wt%) (b) and  $\text{Nb}_2\text{O}_5\text{-Ti}_3\text{C}_2$  (0.8 wt%) (c) layers.

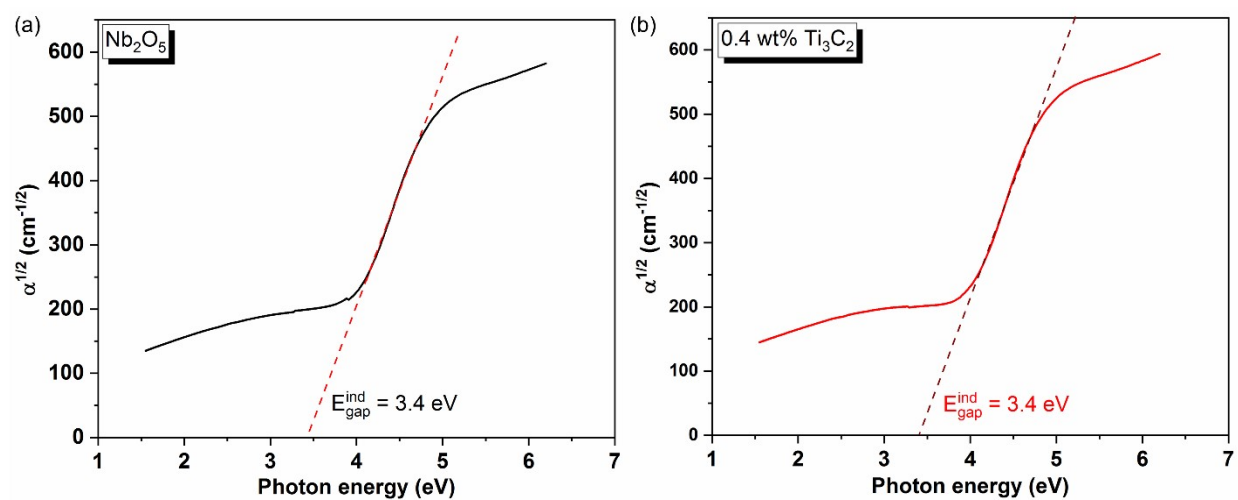

**Figure S5.** Tauc plots of  $\text{Nb}_2\text{O}_5$  (a) and  $\text{Nb}_2\text{O}_5\text{-Ti}_3\text{C}_2$  (0.4 wt%) (b).

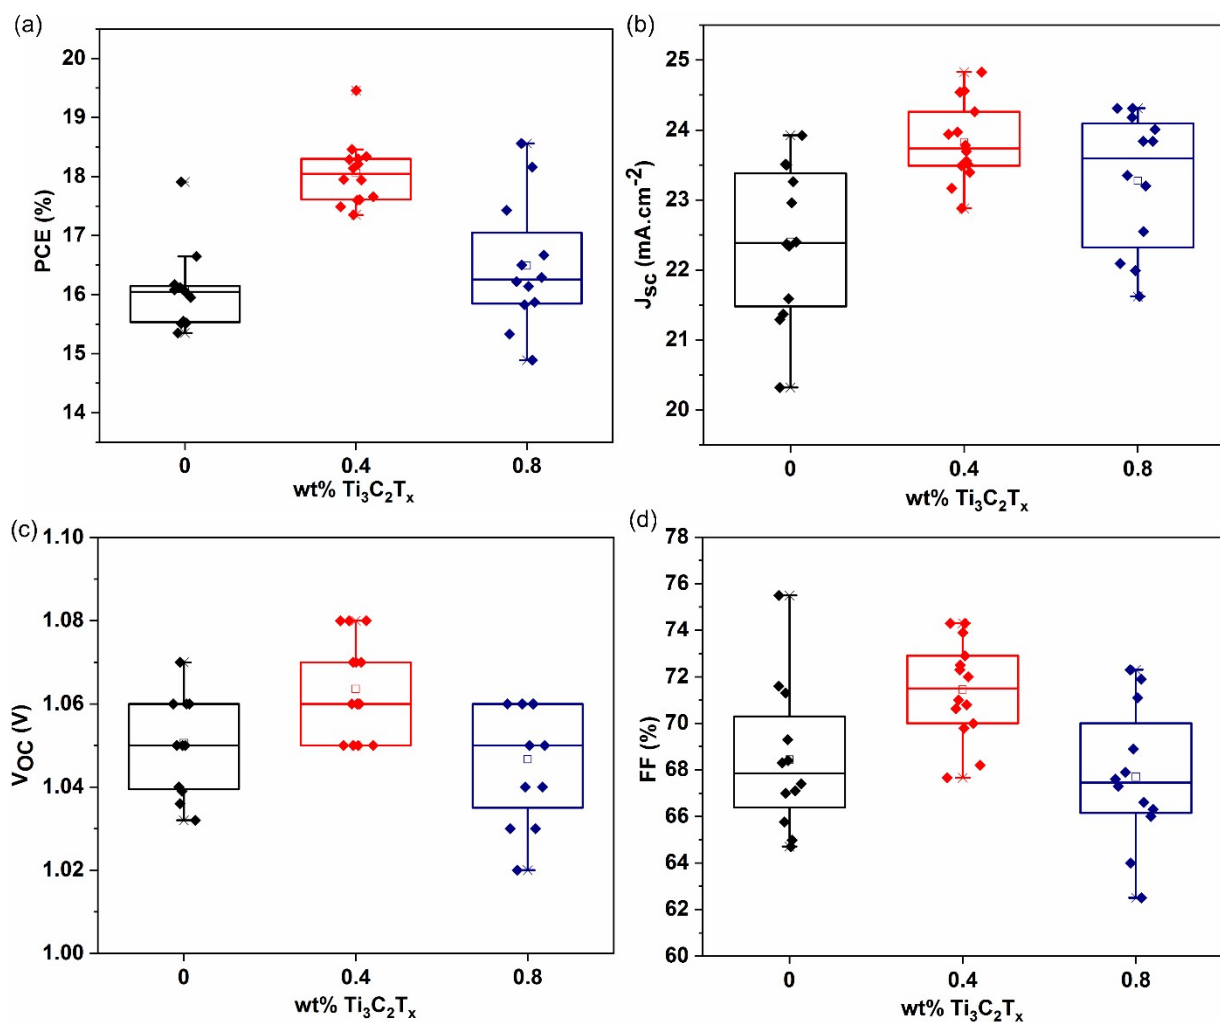

**Figure S6.** Box plots of photovoltaic parameters of PSCs: (a) PCE (%); (b)  $J_{sc}$  ( $\text{mA}\cdot\text{cm}^{-2}$ ); (c)  $V_{oc}$  (V) and (d) FF (%).

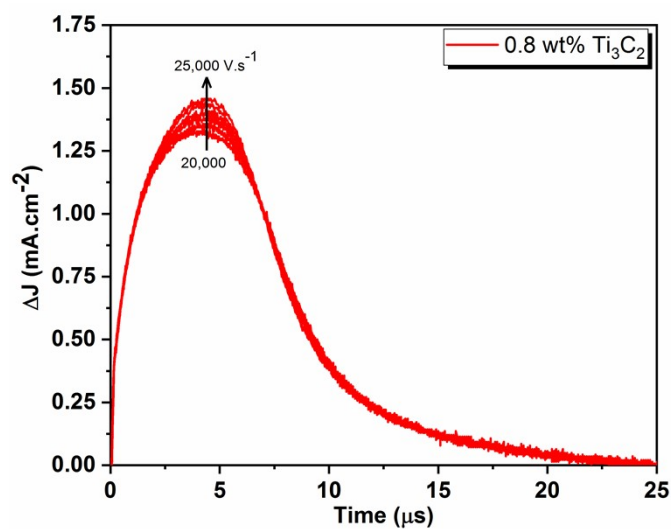

**Figure S7.** Photo-CELIV transient at varying voltage ramp rates.

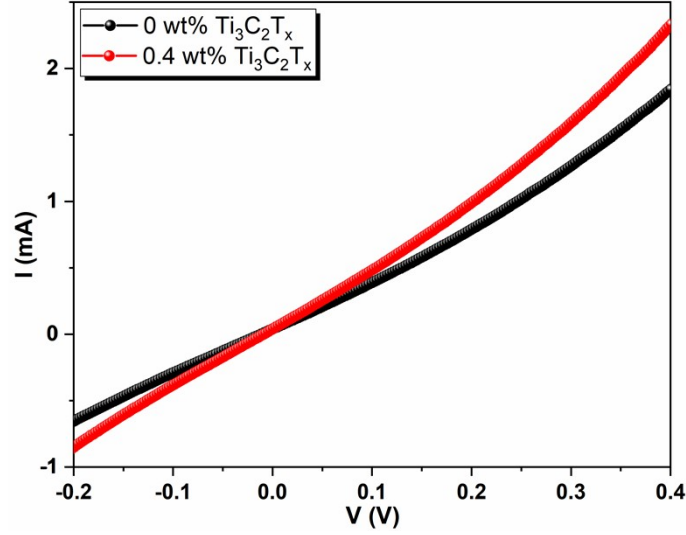

**Figure S8.** Current (I) vs. Voltage (V) curves of Nb<sub>2</sub>O<sub>5</sub> with and without Ti<sub>3</sub>C<sub>2</sub>.

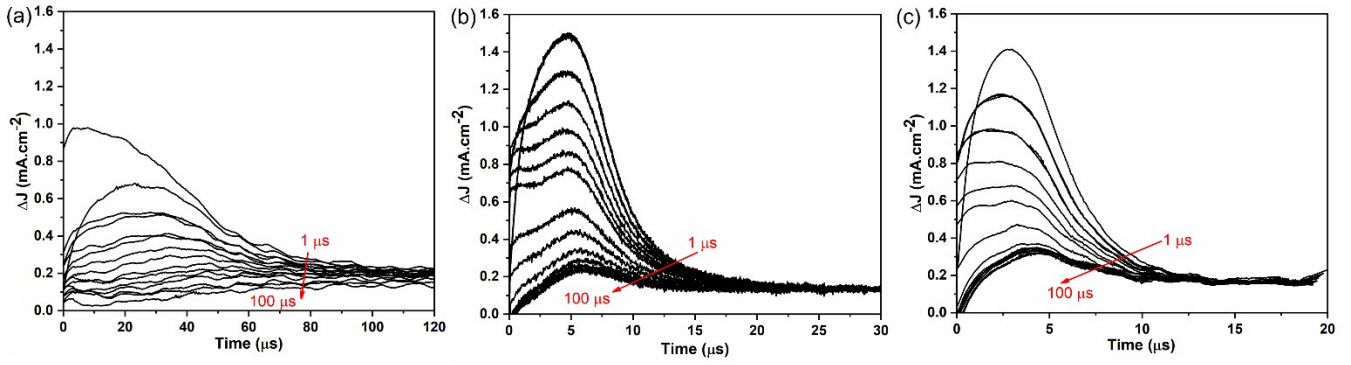

**Figure S9.** Photo-CELIV transient at varying delay time for Nb<sub>2</sub>O<sub>5</sub> (a) and Nb<sub>2</sub>O<sub>5</sub>-Ti<sub>3</sub>C<sub>2</sub> (0.4 wt%) (b) and Nb<sub>2</sub>O<sub>5</sub>-Ti<sub>3</sub>C<sub>2</sub> (0.8 wt%).

**Table S1.** Calculated parameters for the fitted charge-carrier densities decay curves.

| Device                                   | $n_1$ ( $\times 10^{14}$ cm <sup>-3</sup> ) | $\tau_1$ ( $\mu$ s) | $n_2$ ( $\times 10^{14}$ cm <sup>-3</sup> ) | $\tau_2$ ( $\mu$ s) | R <sup>2</sup> |
|------------------------------------------|---------------------------------------------|---------------------|---------------------------------------------|---------------------|----------------|
| Nb <sub>2</sub> O <sub>5</sub>           | $34.82 \pm 2.25$                            | $0.42 \pm 0.12$     | $5.03 \pm 0.04$                             | $8.44 \pm 1.32$     | 0.987          |
| Ti <sub>3</sub> C <sub>2</sub> (0.4 wt%) | $14.68 \pm 1.62$                            | $6.88 \pm 0.23$     | -                                           | -                   | 0.998          |
| Ti <sub>3</sub> C <sub>2</sub> (0.8 wt%) | $5.34 \pm 1.52$                             | $4.86 \pm 0.33$     | -                                           | -                   | 0.991          |
